# Supplementary material for: QSAR modeling and molecular interaction analysis of natural compounds as potent neuraminidase inhibitors
Source: Royal Society of Chemistry journal article supplement (doi:10.1039/c6mb00123h), 2016-03-23
Supplement: c6mb00123h1.pdf [file c6mb00123h1.pdf]

**Table S1** Docking scores, experimental and predicted activities of 40 natural compounds

| <div style="display: flex; justify-content: space-around; align-items: center;"> <div style="text-align: center;"> 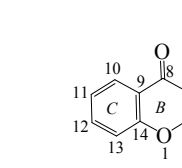 <p>1~7</p> </div> <div style="text-align: center;">  <p>8~21, 35</p> </div> <div style="text-align: center;">  <p>22, 23</p> </div> <div style="text-align: center;">  <p>24~34, 39, 40</p> </div> <div style="text-align: center;">  <p>36~38</p> </div> </div> |      |                                                                                     |                            |                             |       |        |        |              |        |
|------------------------------------------------------------------------------------------------------------------------------------------------------------------------------------------------------------------------------------------------------------------------------------------------------------------------------------------------------------------------------------------------------------------------------------------------------------------------------------------------------------------------------------------------------------------------------------------------------------------------------------------------------------------------------------------------------------------------------------------------------------------------------------------------------------|------|-------------------------------------------------------------------------------------|----------------------------|-----------------------------|-------|--------|--------|--------------|--------|
| No                                                                                                                                                                                                                                                                                                                                                                                                                                                                                                                                                                                                                                                                                                                                                                                                         | Ref. | Structures                                                                          | Exp. pIC <sub>50</sub> (M) | Pred. pIC <sub>50</sub> (M) |       |        |        | Total scores | CScore |
|                                                                                                                                                                                                                                                                                                                                                                                                                                                                                                                                                                                                                                                                                                                                                                                                            |      |                                                                                     |                            | SRA                         | HQSAR | Almond | CoMSIA |              |        |
| 1*                                                                                                                                                                                                                                                                                                                                                                                                                                                                                                                                                                                                                                                                                                                                                                                                         | 31   |    | 6.61                       | 6.17                        | 6.58  | 6.01   | 6.19   | 4.09         | 3      |
| 2                                                                                                                                                                                                                                                                                                                                                                                                                                                                                                                                                                                                                                                                                                                                                                                                          | 31   |    | 6.73                       | 6.69                        | 6.76  | 6.93   | 6.70   | 5.75         | 3      |
| 3                                                                                                                                                                                                                                                                                                                                                                                                                                                                                                                                                                                                                                                                                                                                                                                                          | 31   |   | 6.64                       | 6.51                        | 6.73  | 6.76   | 6.63   | 4.50         | 2      |
| 4                                                                                                                                                                                                                                                                                                                                                                                                                                                                                                                                                                                                                                                                                                                                                                                                          | 31   |  | 5.90                       | 5.88                        | 6.38  | 6.26   | 5.81   | 4.42         | 4      |
| 5*                                                                                                                                                                                                                                                                                                                                                                                                                                                                                                                                                                                                                                                                                                                                                                                                         | 31   |  | 6.56                       | 7.31                        | 6.68  | 6.43   | 6.31   | 6.49         | 5      |
| 6                                                                                                                                                                                                                                                                                                                                                                                                                                                                                                                                                                                                                                                                                                                                                                                                          | 31   |  | 6.73                       | 6.97                        | 6.76  | 6.46   | 6.58   | 7.53         | 5      |
| 7                                                                                                                                                                                                                                                                                                                                                                                                                                                                                                                                                                                                                                                                                                                                                                                                          | 31   |  | 7.10                       | 6.94                        | 6.70  | 6.51   | 7.22   | 6.33         | 3      |
| 8*                                                                                                                                                                                                                                                                                                                                                                                                                                                                                                                                                                                                                                                                                                                                                                                                         | 32   |  | 4.76                       | 4.57                        | 5.45  | 5.32   | 5.38   | 4.26         | 5      |
| 9                                                                                                                                                                                                                                                                                                                                                                                                                                                                                                                                                                                                                                                                                                                                                                                                          | 32   |  | 5.37                       | 5.44                        | 5.62  | 5.77   | 5.43   | 5.42         | 4      |
| 10                                                                                                                                                                                                                                                                                                                                                                                                                                                                                                                                                                                                                                                                                                                                                                                                         | 32   |  | 5.10                       | 5.33                        | 5.43  | 5.26   | 5.52   | 4.65         | 1      |
| 11*                                                                                                                                                                                                                                                                                                                                                                                                                                                                                                                                                                                                                                                                                                                                                                                                        | 32   |  | 5.77                       | 6.36                        | 5.60  | 5.62   | 5.56   | 5.07         | 1      |
| 12                                                                                                                                                                                                                                                                                                                                                                                                                                                                                                                                                                                                                                                                                                                                                                                                         | 32   |  | 5.85                       | 5.52                        | 5.69  | 5.76   | 5.82   | 4.40         | 2      |
| 13                                                                                                                                                                                                                                                                                                                                                                                                                                                                                                                                                                                                                                                                                                                                                                                                         | 32   |  | 6.10                       | 6.16                        | 5.86  | 5.91   | 6.03   | 4.23         | 2      |
| 14                                                                                                                                                                                                                                                                                                                                                                                                                                                                                                                                                                                                                                                                                                                                                                                                         | 32   |  | 4.41                       | 4.16                        | 4.53  | 4.37   | 4.37   | 4.15         | 5      |

|     |    |  |      |      |      |      |      |      |   |
|-----|----|--|------|------|------|------|------|------|---|
| 15* | 32 |  | 4.53 | 5.25 | 4.73 | 4.85 | 5.04 | 4.05 | 4 |
| 16  | 32 |  | 5.21 | 5.27 | 5.24 | 5.26 | 5.32 | 5.19 | 5 |
| 17  | 32 |  | 4.39 | 5.02 | 4.64 | 4.54 | 4.52 | 3.73 | 4 |
| 18* | 32 |  | 4.24 | 4.61 | 3.95 | 5.23 | 4.44 | 3.09 | 4 |
| 19  | 32 |  | 4.41 | 4.31 | 4.38 | 4.77 | 4.31 | 3.11 | 4 |
| 20  | 32 |  | 4.51 | 4.52 | 4.47 | 4.50 | 4.41 | 4.77 | 5 |
| 21  | 32 |  | 4.26 | 4.18 | 4.29 | 3.84 | 4.38 | 3.68 | 5 |
| 22* | 33 |  | 5.85 | 5.15 | 5.39 | 5.30 | 5.80 | 3.46 | 5 |
| 23  | 33 |  | 5.50 | 5.25 | 5.40 | 5.35 | 5.56 | 4.73 | 5 |
| 24  | 33 |  | 4.87 | 4.97 | 4.51 | 4.93 | 4.54 | 4.93 | 4 |
| 25* | 33 |  | 4.82 | 5.05 | 4.48 | 4.58 | 5.00 | 4.42 | 5 |
| 26  | 33 |  | 4.70 | 4.60 | 4.52 | 4.60 | 4.55 | 4.96 | 5 |
| 27  | 33 |  | 4.83 | 5.09 | 4.53 | 4.86 | 5.01 | 4.34 | 4 |
| 28* | 33 |  | 4.74 | 4.73 | 4.85 | 4.89 | 4.87 | 4.71 | 3 |
| 29  | 33 |  | 4.77 | 4.88 | 4.82 | 4.91 | 4.71 | 4.68 | 5 |
| 30  | 33 |  | 4.92 | 4.83 | 4.86 | 4.62 | 4.87 | 5.21 | 5 |
| 31* | 34 |  | 6.42 | 5.74 | 5.75 | 5.65 | 5.17 | 5.91 | 3 |
| 32  | 34 |  | 5.82 | 5.72 | 5.51 | 5.87 | 5.54 | 5.31 | 2 |

|     |    |                                                                                   |      |      |      |      |      |      |   |
|-----|----|-----------------------------------------------------------------------------------|------|------|------|------|------|------|---|
| 33  | 34 | 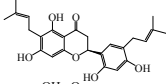 | 4.97 | 4.92 | 4.99 | 4.93 | 4.87 | 4.62 | 5 |
| 34* | 34 |  | 5.09 | 4.87 | 4.90 | 4.88 | 4.75 | 6.41 | 4 |
| 35  | 34 |  | 5.95 | 5.50 | 5.48 | 5.46 | 5.59 | 4.54 | 4 |
| 36  | 34 |  | 5.22 | 5.34 | 5.21 | 5.19 | 5.29 | 5.43 | 2 |
| 37  | 34 |  | 4.99 | 4.90 | 5.12 | 5.04 | 4.98 | 5.00 | 3 |
| 38* | 34 |  | 4.54 | 5.39 | 5.31 | 5.34 | 5.46 | 5.25 | 5 |
| 39  | 34 |  | 4.24 | 4.26 | 4.85 | 4.62 | 4.92 | 5.01 | 4 |
| 40  | 34 |  | 4.80 | 5.08 | 4.99 | 4.98 | 4.79 | 5.07 | 4 |

\*samples in test set

**Table S2** Pred.  $\text{pIC}_{50}$  of all 40 natural compounds by the other eleven hologram lengths during HQSAR modeling

| No  | Exp.   | $\text{pIC}_{50}\text{PRED}_{401}$ | $\text{PRED}_{307}$ | $\text{PRED}_{257}$ | $\text{PRED}_{199}$ | $\text{PRED}_{151}$ | $\text{PRED}_{97}$ | $\text{PRED}_{83}$ | $\text{PRED}_{71}$ | $\text{PRED}_{61}$ | $\text{PRED}_{59}$ | $\text{PRED}_{53}$ |
|-----|--------|------------------------------------|---------------------|---------------------|---------------------|---------------------|--------------------|--------------------|--------------------|--------------------|--------------------|--------------------|
| 1*  | 6.6108 | 6.666                              | 6.622               | 6.644               | 6.628               | 6.580               | 6.569              | 6.709              | 6.572              | 6.579              | 6.645              | 6.694              |
| 2   | 6.7305 | 6.731                              | 6.763               | 6.752               | 6.787               | 6.758               | 6.747              | 6.696              | 6.543              | 6.765              | 6.580              | 6.782              |
| 3   | 6.6421 | 6.694                              | 6.718               | 6.728               | 6.754               | 6.790               | 6.580              | 6.648              | 6.733              | 6.740              | 6.569              | 6.623              |
| 4   | 5.8959 | 6.495                              | 6.475               | 6.411               | 6.434               | 6.407               | 6.483              | 6.613              | 6.446              | 6.483              | 6.487              | 6.530              |
| 5*  | 6.5560 | 6.637                              | 6.548               | 6.822               | 6.622               | 6.666               | 6.903              | 6.590              | 6.662              | 6.629              | 6.682              | 6.624              |
| 6   | 6.7305 | 6.730                              | 6.609               | 6.839               | 6.693               | 6.690               | 6.777              | 6.616              | 6.836              | 6.666              | 6.927              | 6.621              |
| 7   | 7.0969 | 6.743                              | 6.714               | 6.729               | 6.773               | 6.716               | 6.664              | 6.731              | 6.688              | 6.622              | 6.693              | 6.816              |
| 8*  | 4.7595 | 5.409                              | 5.477               | 5.355               | 5.282               | 5.476               | 5.410              | 5.290              | 5.378              | 5.126              | 5.395              | 5.258              |
| 9   | 5.3665 | 5.551                              | 5.608               | 5.585               | 5.444               | 5.576               | 5.550              | 5.334              | 5.459              | 5.263              | 5.470              | 5.403              |
| 10  | 5.0969 | 5.455                              | 5.462               | 5.327               | 5.316               | 5.523               | 5.416              | 5.286              | 5.512              | 5.112              | 5.288              | 5.291              |
| 11* | 5.7696 | 5.594                              | 5.594               | 5.560               | 5.478               | 5.616               | 5.546              | 5.323              | 5.595              | 5.251              | 5.358              | 5.433              |
| 12  | 5.8539 | 5.663                              | 5.632               | 5.643               | 5.544               | 5.587               | 5.621              | 5.386              | 5.650              | 5.310              | 5.494              | 5.430              |
| 13  | 6.0969 | 5.801                              | 5.764               | 5.876               | 5.706               | 5.681               | 5.750              | 5.424              | 5.732              | 5.448              | 5.564              | 5.572              |
| 14  | 4.4056 | 4.590                              | 4.584               | 4.563               | 4.401               | 4.481               | 4.811              | 4.883              | 4.811              | 4.540              | 4.692              | 4.754              |
| 15* | 4.5317 | 4.812                              | 4.772               | 4.703               | 4.737               | 4.927               | 4.880              | 4.861              | 4.827              | 4.567              | 4.617              | 4.902              |
| 16  | 5.2147 | 5.068                              | 5.080               | 5.156               | 5.073               | 5.086               | 4.800              | 4.994              | 5.302              | 4.923              | 5.213              | 5.054              |
| 17  | 4.3915 | 4.737                              | 4.730               | 4.636               | 4.573               | 4.583               | 4.984              | 4.814              | 4.856              | 4.465              | 4.779              | 4.699              |
| 18* | 4.2449 | 4.109                              | 4.085               | 4.086               | 4.036               | 4.013               | 4.452              | 4.453              | 4.545              | 3.912              | 4.149              | 4.136              |
| 19  | 4.4078 | 4.443                              | 4.358               | 4.354               | 4.288               | 4.457               | 4.332              | 4.302              | 4.348              | 4.275              | 4.312              | 4.296              |
| 20  | 4.5100 | 4.433                              | 4.489               | 4.526               | 4.469               | 4.465               | 4.391              | 4.329              | 4.346              | 4.451              | 4.390              | 4.467              |
| 21  | 4.2557 | 4.288                              | 4.348               | 4.296               | 4.307               | 4.363               | 4.268              | 4.275              | 4.272              | 4.318              | 4.324              | 4.321              |
| 22* | 5.8539 | 5.231                              | 5.208               | 5.237               | 5.092               | 5.216               | 5.023              | 5.058              | 5.190              | 5.269              | 5.329              | 5.342              |
| 23  | 5.4949 | 5.263                              | 5.204               | 5.309               | 5.078               | 5.253               | 5.098              | 5.087              | 5.181              | 5.286              | 5.311              | 5.318              |
| 24  | 4.8697 | 4.689                              | 4.603               | 4.708               | 4.688               | 4.667               | 4.745              | 4.886              | 4.627              | 4.890              | 4.684              | 4.826              |
| 25* | 4.8210 | 4.631                              | 4.570               | 4.621               | 4.682               | 4.616               | 4.793              | 4.809              | 4.555              | 4.872              | 4.704              | 4.786              |
| 26  | 4.6968 | 4.706                              | 4.560               | 4.656               | 4.707               | 4.631               | 4.856              | 4.910              | 4.778              | 4.882              | 4.845              | 4.795              |

|     |        |       |       |       |       |       |       |       |       |       |       |       |
|-----|--------|-------|-------|-------|-------|-------|-------|-------|-------|-------|-------|-------|
| 27  | 4.8297 | 4.665 | 4.635 | 4.628 | 4.747 | 4.713 | 4.750 | 4.935 | 4.732 | 4.924 | 4.697 | 4.718 |
| 28* | 4.7375 | 4.645 | 4.615 | 4.742 | 5.092 | 4.595 | 4.551 | 4.658 | 4.553 | 4.888 | 4.507 | 4.668 |
| 29  | 4.7696 | 4.587 | 4.582 | 4.656 | 5.086 | 4.545 | 4.598 | 4.580 | 4.481 | 4.870 | 4.527 | 4.628 |
| 30  | 4.9172 | 4.621 | 4.647 | 4.663 | 5.151 | 4.641 | 4.555 | 4.707 | 4.658 | 4.922 | 4.520 | 4.560 |
| 31* | 6.4202 | 5.113 | 5.211 | 5.311 | 6.220 | 5.245 | 5.223 | 5.017 | 5.327 | 5.489 | 5.210 | 5.093 |
| 32  | 5.8153 | 5.280 | 5.431 | 5.337 | 5.713 | 5.483 | 5.425 | 5.349 | 5.440 | 5.578 | 5.575 | 5.224 |
| 33  | 4.9690 | 5.076 | 5.168 | 4.992 | 4.850 | 5.082 | 5.124 | 5.385 | 5.015 | 5.606 | 5.287 | 5.071 |
| 34* | 5.0894 | 5.019 | 5.004 | 4.989 | 4.856 | 5.081 | 5.093 | 4.999 | 4.948 | 4.901 | 5.000 | 5.053 |
| 35  | 5.9469 | 5.454 | 5.487 | 5.451 | 5.216 | 5.487 | 5.423 | 5.300 | 5.322 | 5.118 | 5.338 | 5.421 |
| 36  | 5.2211 | 5.267 | 5.290 | 5.300 | 5.393 | 5.282 | 5.321 | 5.309 | 5.245 | 5.352 | 5.241 | 5.487 |
| 37  | 4.9940 | 5.186 | 5.242 | 5.191 | 5.284 | 5.182 | 5.193 | 5.378 | 5.254 | 5.420 | 5.201 | 5.471 |
| 38* | 4.5375 | 5.327 | 5.360 | 5.335 | 5.400 | 5.395 | 5.404 | 5.420 | 5.500 | 5.618 | 5.197 | 5.365 |
| 39  | 4.2372 | 4.950 | 4.975 | 4.855 | 4.798 | 5.021 | 4.955 | 5.015 | 4.949 | 4.949 | 5.055 | 4.994 |
| 40  | 4.7967 | 5.086 | 5.092 | 5.086 | 4.979 | 5.098 | 5.036 | 5.073 | 5.034 | 5.064 | 5.183 | 5.073 |

\*samples in test set.

**Table S3** The individual atomic contribution to activity of all 40 natural compounds

| No  | Exp. pIC <sub>50</sub> | Green numbers | Yellow numbers | Orange numbers | Red numbers |
|-----|------------------------|---------------|----------------|----------------|-------------|
| 1*  | 6.61                   | 4             | 2              | 0              | 0           |
| 2   | 6.73                   | 3             | 5              | 0              | 0           |
| 3   | 6.64                   | 3             | 2              | 0              | 0           |
| 4   | 5.90                   | 2             | 2              | 0              | 0           |
| 5*  | 6.56                   | 2             | 0              | 0              | 0           |
| 6   | 6.73                   | 2             | 2              | 0              | 0           |
| 7   | 7.10                   | 3             | 3              | 0              | 0           |
| 8*  | 4.76                   | 0             | 0              | 0              | 0           |
| 9   | 5.37                   | 0             | 0              | 0              | 0           |
| 10  | 5.10                   | 0             | 0              | 0              | 0           |
| 11* | 5.77                   | 0             | 0              | 0              | 0           |
| 12  | 5.85                   | 0             | 0              | 0              | 0           |
| 13  | 6.10                   | 0             | 0              | 0              | 0           |
| 14  | 4.41                   | 0             | 0              | 4              | 6           |
| 15* | 4.53                   | 0             | 0              | 3              | 6           |
| 16  | 5.21                   | 0             | 0              | 0              | 0           |
| 17  | 4.39                   | 0             | 0              | 2              | 6           |
| 18* | 4.24                   | 0             | 0              | 5              | 13          |
| 19  | 4.41                   | 0             | 0              | 7              | 10          |
| 20  | 4.51                   | 0             | 0              | 4              | 8           |
| 21  | 4.26                   | 0             | 0              | 4              | 8           |
| 22* | 5.85                   | 0             | 0              | 0              | 0           |
| 23  | 5.50                   | 0             | 0              | 0              | 0           |
| 24  | 4.87                   | 0             | 0              | 6              | 0           |
| 25* | 4.82                   | 0             | 0              | 6              | 0           |
| 26  | 4.70                   | 0             | 0              | 5              | 0           |
| 27  | 4.83                   | 0             | 0              | 5              | 0           |
| 28* | 4.74                   | 0             | 0              | 5              | 1           |

|     |      |   |   |   |   |
|-----|------|---|---|---|---|
| 29  | 4.77 | 0 | 0 | 6 | 1 |
| 30  | 4.92 | 0 | 0 | 4 | 1 |
| 31* | 6.42 | 0 | 0 | 1 | 0 |
| 32  | 5.82 | 0 | 0 | 2 | 0 |
| 33  | 4.97 | 0 | 0 | 4 | 0 |
| 34* | 5.09 | 0 | 0 | 2 | 1 |
| 35  | 5.95 | 0 | 0 | 0 | 0 |
| 36  | 5.22 | 0 | 0 | 1 | 1 |
| 37  | 4.99 | 0 | 0 | 1 | 1 |
| 38* | 4.54 | 0 | 0 | 1 | 1 |
| 39  | 4.24 | 0 | 0 | 1 | 1 |
| 40  | 4.80 | 0 | 0 | 2 | 1 |

Colors at the red end of the spectrum (Red: less than  $-0.241462$ ; Red\_orange:  $-0.241462$  to  $-0.144877$ ; Orange:  $-0.144877$  to  $-0.0965847$ ; White:  $-0.0965847$  to  $0.10176$ ; Yellow:  $0.10176$  to  $0.15264$ ; Green\_blue:  $0.15264$  to  $0.254399$ ; Good > Green:  $0.254399$  and above; Common backbone: cyan). \*samples in test set.

**Table S4** Statistical results and relative contributions of the constructed QSAR models

| Methods | $R^2$ | $SE$  | $F$     | $Q^2$ | $SE_{cv}$ | $R^2_{test}$ | $Q^2_{ext}$ | $A$ | Relative contributions |               |             |       |          |
|---------|-------|-------|---------|-------|-----------|--------------|-------------|-----|------------------------|---------------|-------------|-------|----------|
|         |       |       |         |       |           |              |             |     | Steric                 | Electrostatic | Hydrophobic | Donor | Acceptor |
| SRA     | 0.931 | 0.248 | 39.248  | 0.856 | 0.362     | 0.611        | 0.565       |     |                        |               |             |       |          |
| HQSAR   | 0.903 | 0.271 |         | 0.767 | 0.419     | 0.753        | 0.750       | 3   |                        |               |             |       |          |
| Almond  | 0.904 | 0.249 |         | 0.511 | 0.563     | 0.612        | 0.582       | 4   |                        |               |             |       |          |
| CoMSIA  | 0.936 | 0.220 | 116.309 | 0.654 | 0.511     | 0.582        | 0.571       | 3   | 0.136                  | 0.265         | 0.208       | 0.251 | 0.140    |

$R^2$ : squared multiple correlation coefficients;  $SE$ : standard error;  $F$ : Fisher Statistic;  $Q^2$ : squared cross-validated correlation coefficient;  $SE_{cv}$ : cross-validated standard error;  $R^2_{test}$  and  $Q^2_{ext}$  are  $R^2$  and  $Q^2$  of test set, respectively;  $A$ : Components.

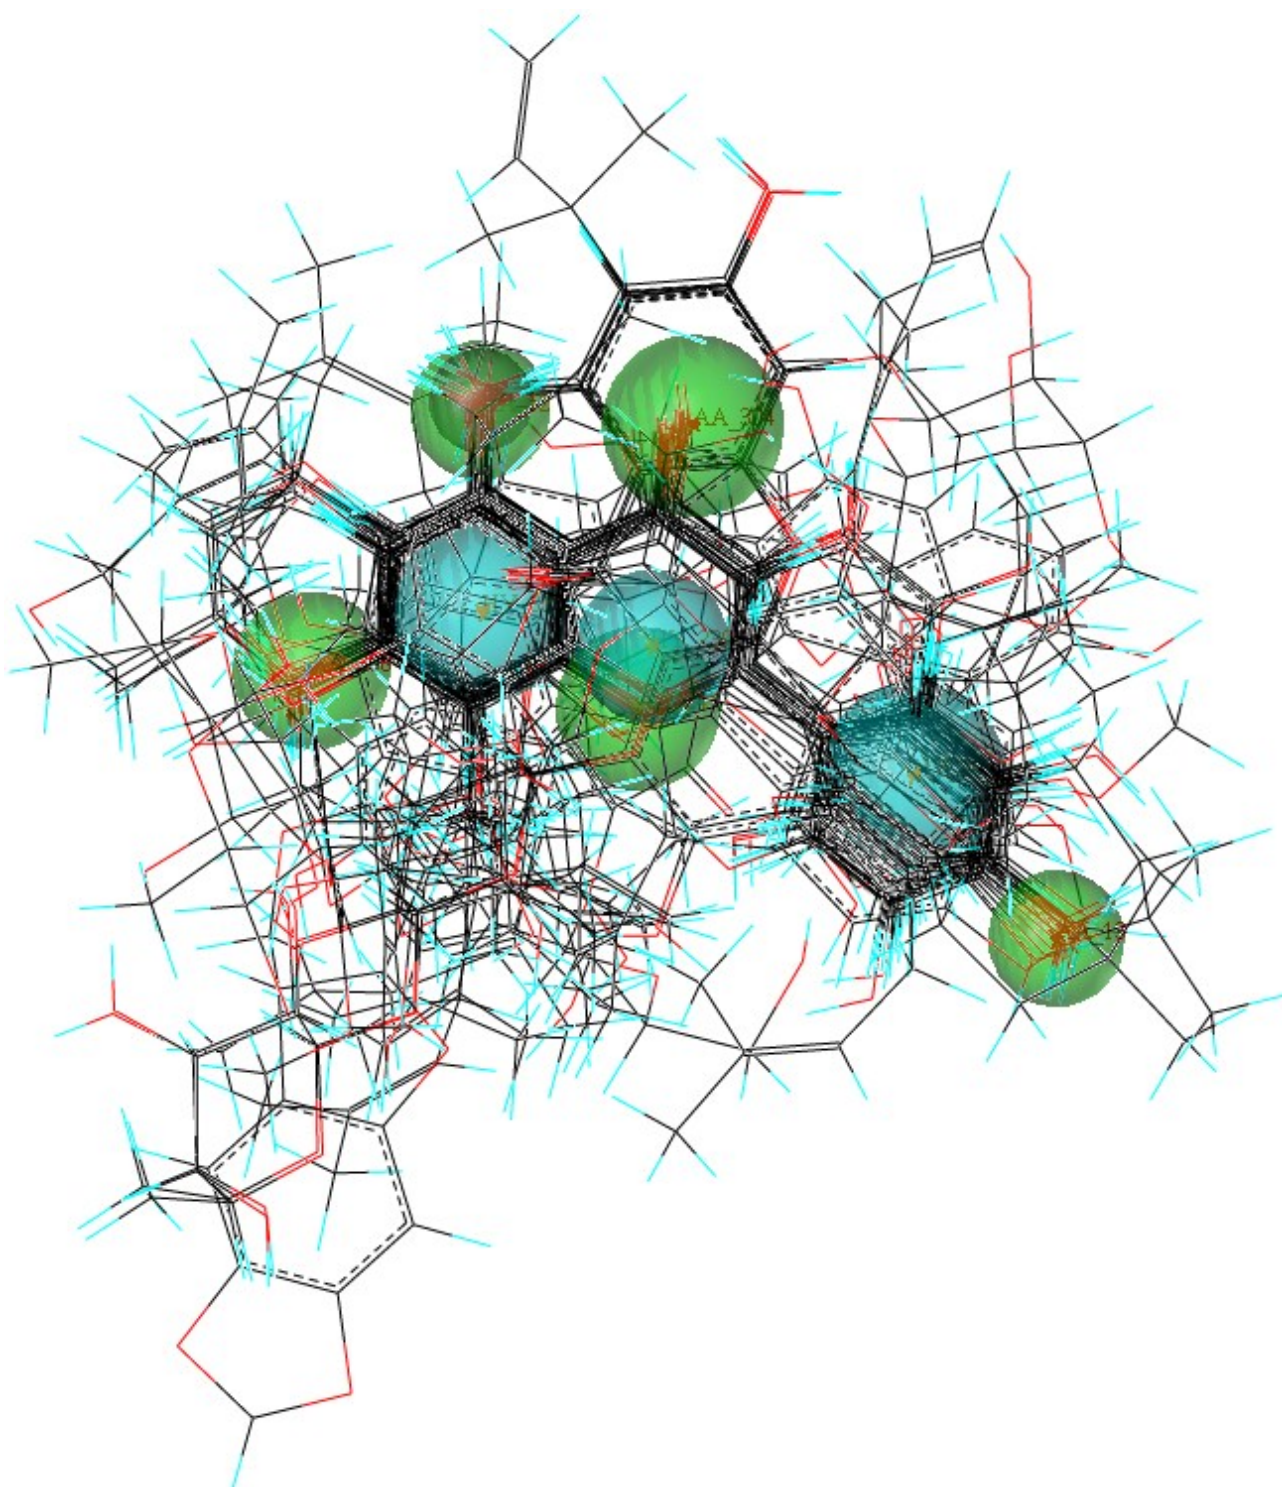

**Fig. S1** Pharmacophore models of 40 natural compounds (Donor Atoms (DA), Acceptor Atoms (AA) and Hydrophobes (HY) included DA\_1, AA\_12, AA\_13, AA\_24, AA\_304, AA\_308, HY\_28, HY\_239 and HY\_310. A: references molecules with all samples;)

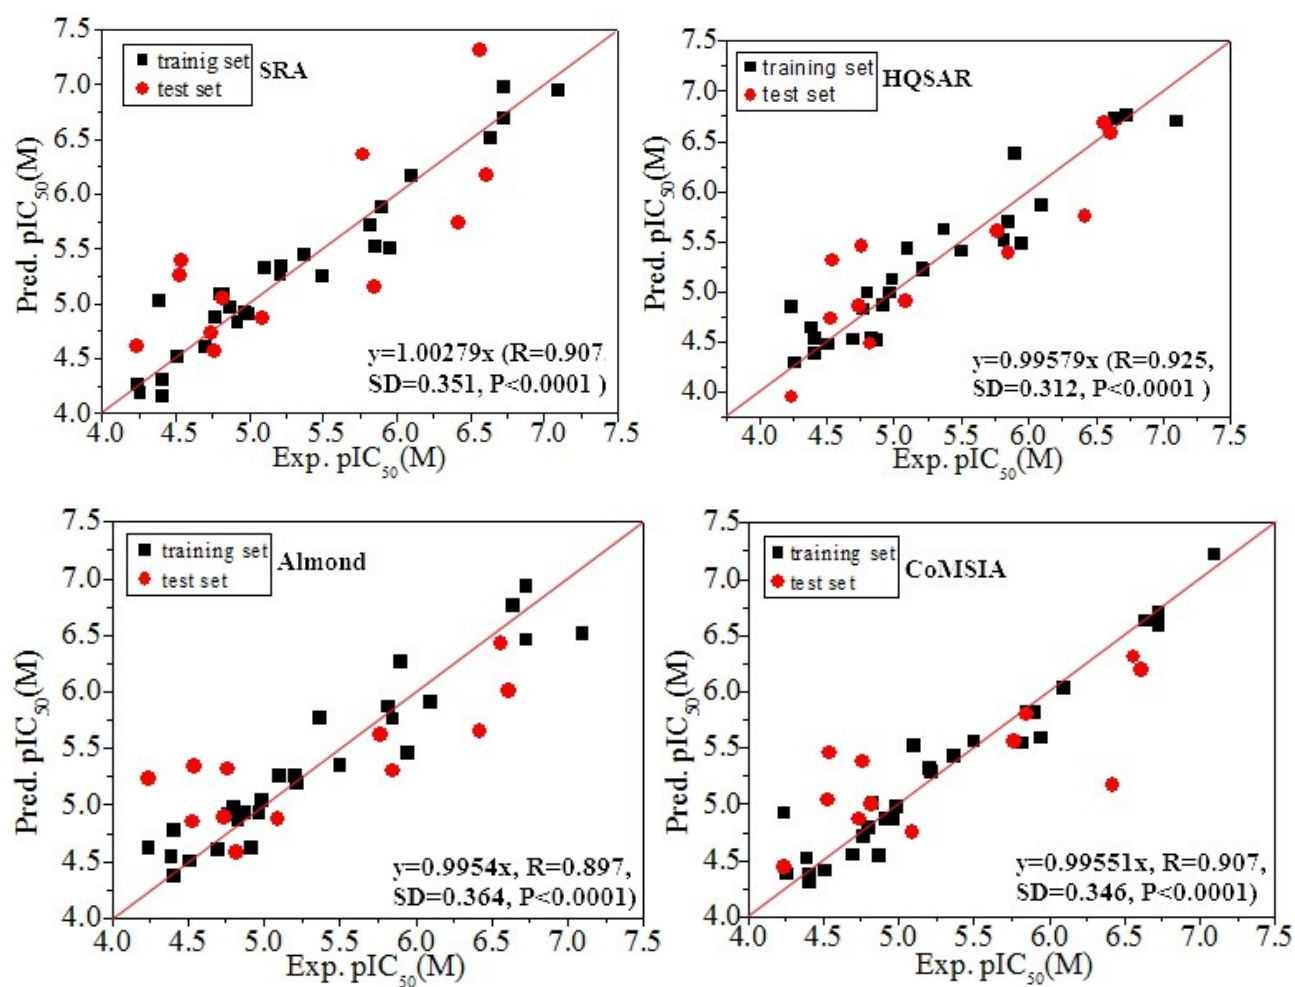

**Fig. S2** Relative plot of Exp. vs Pred. activities of all 40 natural compounds through origin

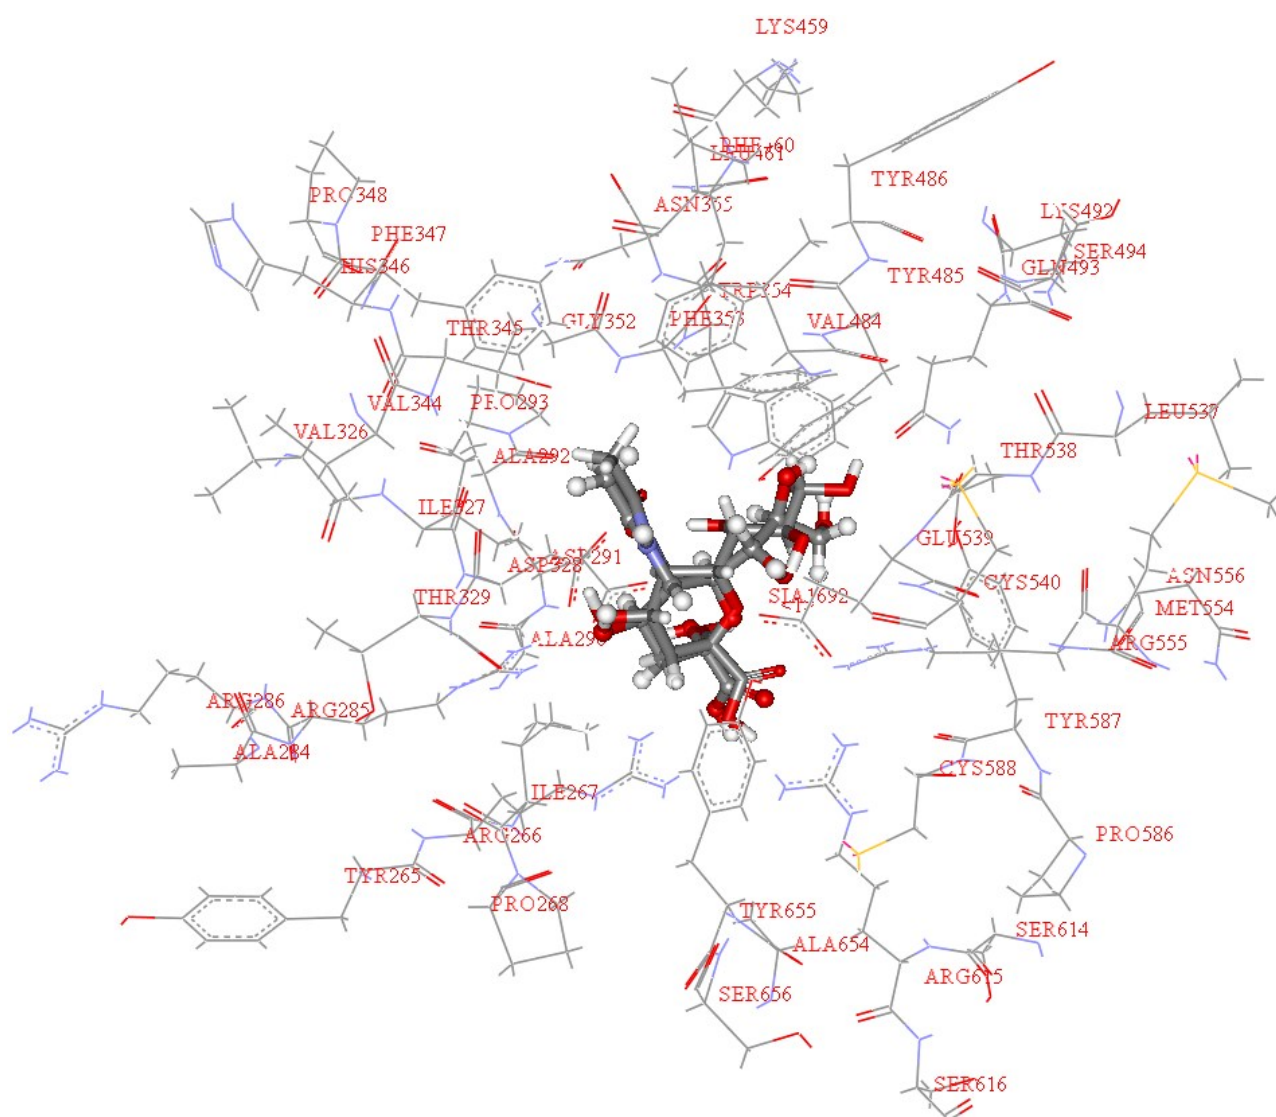

**Fig. S3** Comparison between the position calculated of Sia1692 with ball and stick and that observed in the crystal structure with stick



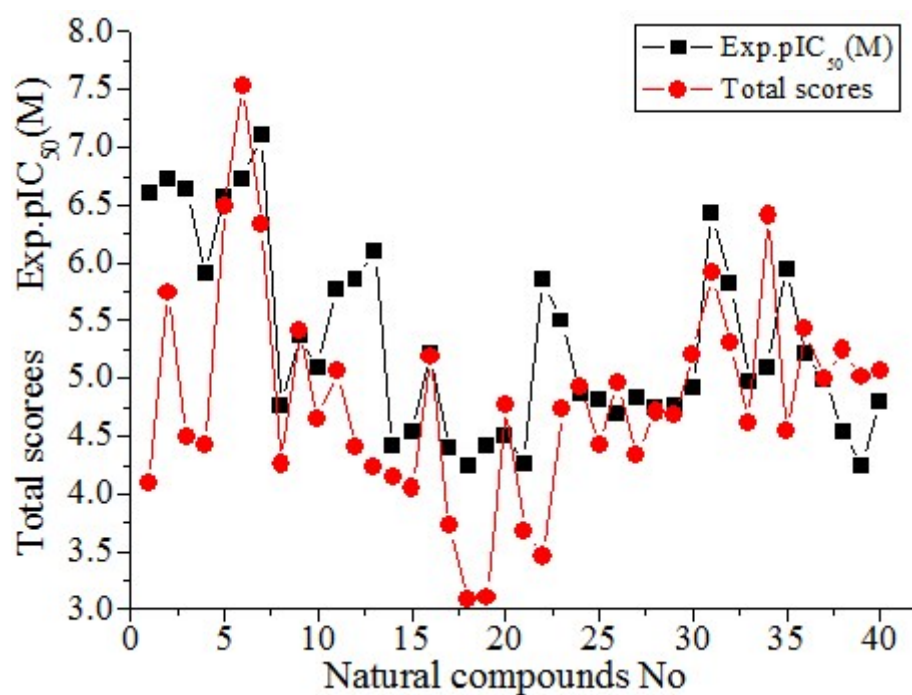

**Fig. S4** Scatter plots of compounds No against Exp.IC<sub>50</sub> and total scores, respectively

**Table S5** Total scores, D Score, PMF Score, G Score and CHEM Score and CScore of all 40 natural compounds by docking

| No  | Total scores | D_SCORE   | PMF_SCORE | G_SCORE   | CHEMSCORE | CScore |
|-----|--------------|-----------|-----------|-----------|-----------|--------|
| 1*  | 4.09         | -83.3382  | -131.7836 | -130.2180 | -23.0371  | 3      |
| 2   | 5.75         | -118.9624 | -95.5739  | -159.7962 | -15.9716  | 3      |
| 3   | 4.50         | -79.6943  | -128.2329 | -101.9323 | -19.1250  | 2      |
| 4   | 4.42         | -95.2721  | -146.1366 | -130.7881 | -23.6543  | 4      |
| 5*  | 6.49         | -120.5729 | -155.4849 | -185.6666 | -23.6158  | 5      |
| 6   | 7.53         | -120.0477 | -126.3347 | -173.4963 | -27.2598  | 5      |
| 7   | 6.33         | -84.1571  | -125.6944 | -120.8778 | -24.0651  | 3      |
| 8*  | 4.26         | -115.2557 | -103.4057 | -122.6915 | -26.6344  | 5      |
| 9   | 5.42         | -99.8512  | -64.1845  | -128.8416 | -31.0606  | 4      |
| 10  | 4.65         | -82.2945  | -76.8272  | -33.2681  | -19.5973  | 1      |
| 11* | 5.07         | -63.5117  | -83.1828  | -21.3383  | -14.9107  | 1      |
| 12  | 4.40         | -82.7594  | -126.1803 | -17.0104  | -18.6786  | 2      |
| 13  | 4.23         | -85.5622  | -120.1079 | 2.2266    | -10.0464  | 2      |
| 14  | 4.15         | -149.3261 | -151.7645 | -179.3238 | -21.1895  | 5      |
| 15* | 4.05         | -156.9900 | -174.6023 | -88.4821  | -15.2340  | 4      |
| 16  | 5.19         | -147.4066 | -184.9815 | -132.3911 | -27.4204  | 5      |
| 17  | 3.73         | -150.0468 | -169.6074 | -91.0250  | -21.7321  | 4      |
| 18* | 3.09         | -179.2369 | -220.2221 | -78.4489  | -18.1962  | 4      |
| 19  | 3.11         | -165.6004 | -173.4856 | -136.8723 | -16.9232  | 4      |
| 20  | 4.77         | -190.1011 | -231.5389 | -137.6082 | -15.5093  | 5      |
| 21  | 3.68         | -217.5586 | -199.8963 | -169.8890 | -27.2876  | 5      |
| 22* | 3.46         | -114.5160 | -109.6673 | -169.0315 | -25.1678  | 5      |
| 23  | 4.73         | -107.6432 | -118.7135 | -138.8738 | -26.4312  | 5      |
| 24  | 4.93         | -178.0596 | -119.7367 | -234.1309 | -30.0116  | 4      |

|     |      |           |           |           |          |   |
|-----|------|-----------|-----------|-----------|----------|---|
| 25* | 4.42 | -156.9080 | -123.2411 | -256.3464 | -28.9414 | 5 |
| 26  | 4.96 | -133.7573 | -149.6852 | -206.7737 | -32.0590 | 5 |
| 27  | 4.34 | -137.6305 | -134.2722 | -206.7470 | -27.7289 | 4 |
| 28* | 4.71 | -126.4227 | -147.6297 | -141.1850 | -29.3066 | 3 |
| 29  | 4.68 | -144.9420 | -131.0761 | -198.0954 | -30.1156 | 5 |
| 30  | 5.21 | -146.8705 | -159.6862 | -211.9809 | -31.4341 | 5 |
| 31* | 5.91 | -120.3168 | -134.7208 | -147.9898 | -20.6933 | 3 |
| 32  | 5.31 | -92.4661  | -134.2514 | -124.1484 | -22.5388 | 2 |
| 33  | 4.62 | -133.3988 | -131.7382 | -182.4661 | -25.6405 | 5 |
| 34* | 6.41 | -92.8379  | -118.4574 | -96.0152  | -22.8506 | 4 |
| 35  | 4.54 | -94.3208  | -102.6061 | -68.1182  | -22.6758 | 4 |
| 36  | 5.43 | -84.3992  | -119.0178 | -60.7943  | -14.4600 | 2 |
| 37  | 5.00 | -126.5704 | -111.3110 | -129.8324 | -18.7761 | 3 |
| 38* | 5.25 | -129.1892 | -122.3137 | -182.8948 | -29.1835 | 5 |
| 39  | 5.01 | -108.7310 | -96.8172  | -114.3707 | -22.0992 | 4 |
| 40  | 5.07 | -120.8250 | -136.4040 | -124.1303 | -20.0643 | 4 |

\*samples in test set.

**Table S6** hydrogen bond interactions residues of 40 samples in the active pocket of 2bf6

| No  | hydrogen bond interactions residues in the active pocket of 2bf6       |
|-----|------------------------------------------------------------------------|
| 1*  | Arg266, Tyr485, Gln493, Arg555, Arg615, Tyr655                         |
| 2   | Arg266, Arg285, Asp328, Arg615                                         |
| 3   | Tyr485, Arg555, Arg615, Tyr655                                         |
| 4   | Arg266, Tyr485, Gln493, Arg555                                         |
| 5*  | Arg266, Arg285, Asp328, Arg615                                         |
| 6   | Arg266, Arg285, Asp328, Arg615                                         |
| 7   | Arg266, Arg285, Asp328, Arg555                                         |
| 8*  | Arg266, Arg285, Asp328, Arg555, Arg615, Tyr655                         |
| 9   | Asp291, Trp354, Tyr485, Gln493, Tyr587                                 |
| 10  | Asp291, Trp354, Tyr485, Gln493, Tyr587                                 |
| 11* | Asp291, Ala292, Trp354, Gln493, Tyr485, Tyr587                         |
| 12  | Arg285, Asp291, Asp328, Gln493                                         |
| 13  | Arg266, Asp328, Gln493, Arg555, Arg615, Tyr655                         |
| 14  | Asp291, Trp354, Tyr485, Gln493, Arg555, Tyr587                         |
| 15* | Arg285, Asp291, Asp328, Gln493, Arg555, Arg615, Tyr655                 |
| 16  | Arg266, Arg285, Asp328, Thr345, Arg555, Arg615                         |
| 17  | Asp291, Asp328, Trp354, Arg555, Arg615, Tyr655                         |
| 18* | Arg266, Arg285, Asp291, Asp328, Trp354, Tyr485, Glu539, Arg555, Arg615 |
| 19  | Arg266, Asp291, Asp328, Trp354, Gln493, Thr538, Tyr587, Tyr655         |
| 20  | Arg285, Asp328, Trp354, Tyr485, Gln493, Glu539, Tyr655                 |
| 21  | Arg285, Asp291, Asp328, Trp354, Tyr485, Gln493, Thr538, Tyr587         |
| 22* | Tyr485, Arg555, Arg615, Tyr655                                         |
| 23  | Arg285, Asp328, Gln493                                                 |
| 24  | Asp291, Gln493, Tyr587                                                 |
| 25* | Arg285, Asp328, Arg555, Arg615, Tyr655                                 |
| 26  | Ala292, Phe353, Gln493, Tyr587                                         |

---

|     |                                                        |
|-----|--------------------------------------------------------|
| 27  | Tyr485, Gln493, Tyr587                                 |
| 28* | Ala292, Phe353, Trp354, Tyr485, Tyr655                 |
| 29  | Asp291, Asp328, Tyr587                                 |
| 30  | Arg266, Asp291, Tyr485, Gln493, Tyr655                 |
| 31* | Tyr485, Glu539, Tyr587, Arg615, Tyr655,                |
| 32  | Arg266, Trp354, Arg555, Arg615, Tyr655                 |
| 33  | Arg266, Asp291, Glu539, Arg555, Tyr655                 |
| 34* | Arg266, Arg285, Asp328, Trp354, Arg555, Arg615, Tyr655 |
| 35  | Asp291, Trp354, Gln493, Thr538, Glu539, Tyr587, Tyr655 |
| 36  | Arg266, Gln493, Thr538, Tyr655                         |
| 37  | Trp354, Thr538, Tyr655                                 |
| 38* | Tyr485, Arg555, Arg615, Tyr655                         |
| 39  | Gln493, Thr538, Arg615, Tyr655                         |
| 40  | Gln493, Thr538, Glu539, Tyr587, Arg615, Tyr655         |

---

\*samples in test set.
